# Supplementary material for: Low temperature aqueous phase hydrogenation of the light oxygenate fraction of bio-oil over supported ruthenium catalysts
Source: Royal Society of Chemistry journal article supplement (doi:10.1039/c7gc00367f), 2017-01-01
Supplement: c7gc00367f1.pdf [file c7gc00367f1.pdf]

**Table S1** Aqueous phase hydrogenation of the light oxygenate fraction of bio oil over 5 wt% Ru/C catalyst. Reaction conditions: Pressure 5.18 MPa, Temperature 120 °C, WHSV 1.5 h<sup>-1</sup>, and H<sub>2</sub> flow rate 40 mL min<sup>-1</sup>.

| Species (mmol L <sup>-1</sup> ) | Feed   | 6h products | 24h products |
|---------------------------------|--------|-------------|--------------|
| Acetic acid                     | 1936.6 | 1323.7      | 1873.2       |
| Hydroxymethylfurfural           | 0.9    | 0           | 3.2          |
| Furfural                        | 61.6   | 0           | 0.9          |
| Formic acid                     | 230.8  | 8.4         | 38.8         |
| Acetaldehyde                    | 28.7   | 0           | 5.3          |
| Methanol                        | 423.8  | 657.1       | 607.0        |
| Ethanol                         | 4.1    | 167.3       | 33.6         |
| Hydroxyacetaldehyde             | 610.7  | 10.0        | 23.1         |
| Hydroxyacetone                  | 477.5  | 8.5         | 623.7        |
| Propionic acid                  | 104.9  | 51.0        | 140.4        |
| Butyric acid                    | 211.2  | 15.7        | 40.4         |
| 1,2-propanediol                 | 0      | 351.3       | 25.0         |
| Ethylene glycol                 | 0      | 382.4       | 145.3        |
| 2-propanol                      | 0      | 13.9        | 2.9          |
| 1-butanol                       | 0      | 12.7        | 1.5          |
| 1,4-butanediol                  | 0      | 150.9       | 72.3         |
| 1,3-butanediol                  | 20.2   | 11.8        | 10.2         |
| 2,3-butanediol                  | 0      | 71.0        | 29.2         |
| 1,4-pentanediol                 | 0      | 76.9        | 59.1         |
| 1,5-pentanediol                 | 0      | 14.1        | 7.6          |
| 2-methylfuran                   | 11.2   | 22.7        | 11.2         |
| Furfuryl alcohol                | 0      | 17.9        | 4.2          |
| 3-hexanol                       | 0      | 27.6        | 12.8         |
| Phenol                          | 26.5   | 0           | 5.5          |
| Carbon identified in liquid     |        | 7950        | 8603         |
| TOC in liquid                   | 14615  | 10279       | 12639        |
| Carbon in liquid phase (%)      |        | 70          | 87           |
